# Supplementary material
Source: publisher figshare collection journal article supplement (https://acs.figshare.com/ndownloader/files/8290862)
Supplement: Supplementary file 1 [file 8290862]

## **Electronic Supplementary Information**

# New Intermediate Polymorph of 1-Fluoro-adamantane and Its Second-Order-like Transition toward the Low Temperature Phase

Lina Yuan,<sup>a</sup> Simon Clevers,<sup>a</sup> Antoine Burel,<sup>a</sup> Philippe Negrier,<sup>b</sup> Maria del Barrio,<sup>c</sup> Bacem Ben Hassine,<sup>b,c</sup> Denise Mondieig,<sup>b</sup> Valérie Dupray,<sup>a</sup> Josep Ll. Tamarit<sup>c</sup> and Gérard Coquerel<sup>a\*</sup>

<sup>a</sup> Normandie Université, Laboratoire SMS-EA3233, Université de Rouen, F-76821, Mont Saint Aignan, France.

<sup>b</sup> LOMA, UMR 5798, CNRS, Université de Bordeaux, F-33400 Talence, France.

<sup>c</sup> Grup de Caracterització de Materials, Department de Física, EEBE, Campus Diagonal-Besòs, Eduard Maristany, 10-14, Universitat Politècnica de Catalunya, 08019 Barcelona, Catalonia, Spain.

The author to whom correspondence: Gérard Coquerel

E-mail : [gerard.coquerel@univ-rouen.fr](mailto:gerard.coquerel@univ-rouen.fr)

### **SI-1. (a) Purification procedure for 1-fluoro-adamantane.**

1-Fluoro-adamantane (CAS registry number: 768-92-3) was purchased from ABCR in Germany. A saturated solution was prepared by dissolving the commercial 1-fluoro-adamantane in methanol (HPLC grade) at 40°C. The solution was filtrated at this temperature and put at room temperature in a glass vial. The crystals of 1-fluoro-adamantane were grown from the solution by slow evaporation.

### **(b) Purity checking process of purified 1-fluoro-adamantane.**

Impurity levels in 1-fluoro-adamantane were monitored by Gas Chromatography (GC). Preliminary experiments made using a mass spectrometer detector allowed the identification of 1-adamantanol as the only detectable impurity in the commercial product. The impurity was quantified in 1-fluoro-adamantane samples according to the method described below:

**Chromatographic conditions:** GC measurements were carried out in an Agilent 7890B Series GC equipped with a flame ionization detector (FID) and an auto-sampler (10  $\mu$ L syringe). The injector and detector temperatures were set at 300 °C. Hydrogen was used as carrier gas. A DB-35ms 30 m  $\times$  0.25 mm  $\times$  0.25  $\mu$ m column was used for separations. The inlet split flow was 10 mL/min. The column outlet flow was 1.0 mL/min. Oven temperature was programmed from 50°C to 150°C at 5 °C/min. The FID was supplied with 30 mL/min hydrogen and 300 mL/min air. The acquisition rate was 200 Hz. For every solution, the injection volume was set at 1  $\mu$ L - this volume was repeatable which allowed quantification by external standard calibration. In these conditions, 1-fluoro-adamantane and 1-adamantanol retention times were 14.80 min and 18.50 min, respectively.

**FID calibration:** The detector was calibrated by injecting 1-adamantanol solutions in acetone ranging from 10 to 100 ppm. Detector response (1-adamantanol peak area)

was modelled with respect to the concentration by a straight line ( $y = 0.6594x + 0.582$ ,  $R^2 = 0.998$ ).

**1-adamantanol quantification:** Sample solutions were prepared by dissolving ca. 8 mg 1-fluoro-adamantane in ca. 1 g acetone. After analysis by GC, 1-adamantanol concentration in the solution was determined using the calibration curve. The value was divided by the concentration of sample in the analysed solution to obtain 1-adamantanol level in the sample.

**SI-2. DSC curve for the phase transitions of 1-F-A measured at 5 K/min heating/cooling rate.**

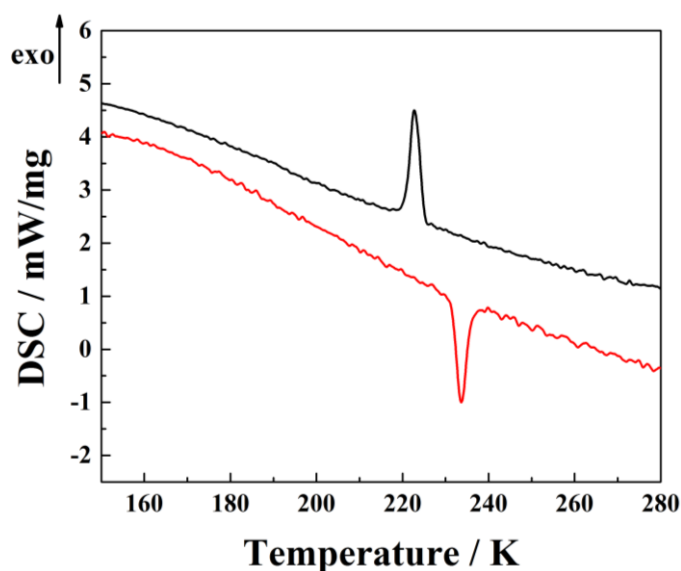

**Figure SI-2.** DSC measuring curves obtained for the phase transitions of 1-F-A. Black line: upon cooling (5 K/min), onset: 225.1K; red line, upon heating (5 K/min), onset: 231.5K.

**SI-3. TR-SHG curve obtained for 1-fluoro-adamantane by annealing at 213K for 10h.**

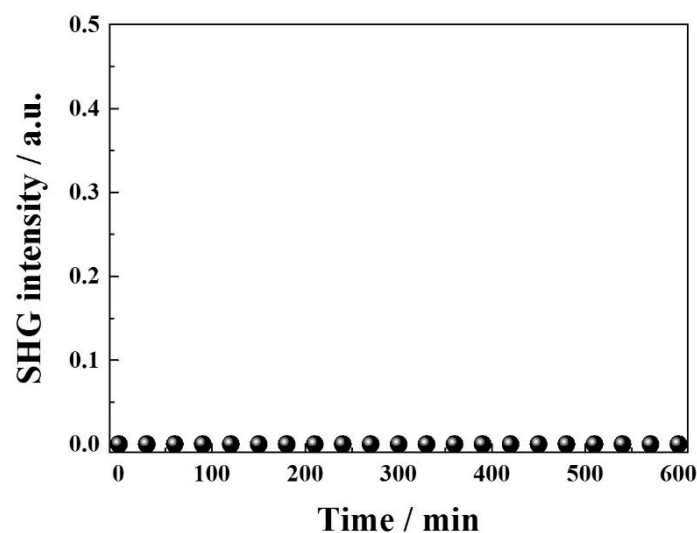

**Figure SI-3.** TR-SHG curve obtained for 1-fluoro-adamantane by annealing at 213K for 10h. No SH signal was detected after 10h of annealing. Suggested that no LT phase was crystallized at 213K.

**SI-4. TR-SHG curve obtained for 1-fluoro-adamantane by annealing at 167K for 10h (inset).**

The TR-SHG measurements were performed while annealing the sample at 167K. The SH signal was recorded every 2min. After 10h, no evolution of the SH signal was observed.

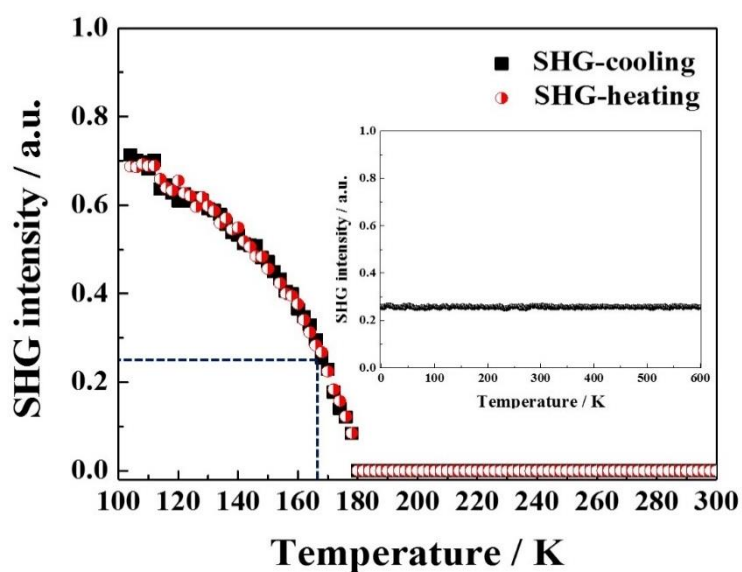

**Figure SI-4.** TR-SHG curve obtained for 1-fluoro-adamantane by annealing at 167K for 10h (inset). After 10h, no evolution of the SH signal was observed. Indicates that the maximum amount of LT phase was

reached at 167K.

#### SI-5. Cold-stage microscopy observations of the phase transition of 1-fluoro-adamantane.

Single crystal was grown on the cap of a closed vial by sublimation at 160°C. The crystal was cooled down at 1K/min to 153K, and was heated at 1K/min. The video was recorded during heating from 153K to 243K. No phenomenon was observed at ca. 178K (the temperature of second-order transition). At ca. 230K, the transition begins. One can observe the propagation of the transition front and the slight change of the volume, which indicate the first-order transition.

#### SI-6. Variations of (a) the unit cell parameter $a$ , (b) the unit cell parameter $c$ , and (c) the volume of 1-fluoro-adamantane in the temperature range of 90K to 220K.

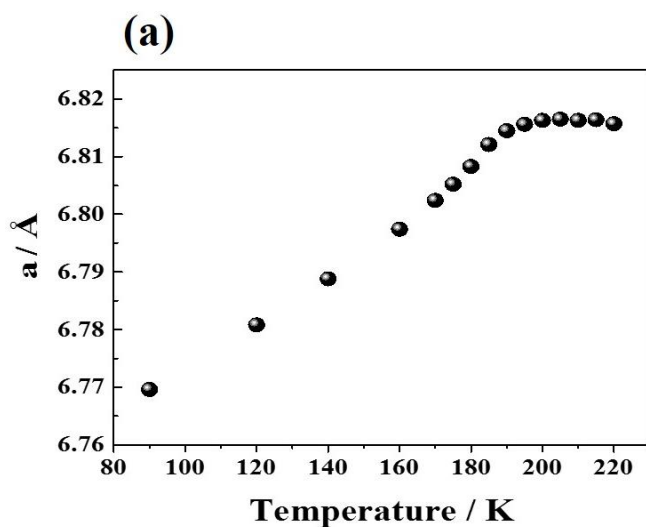

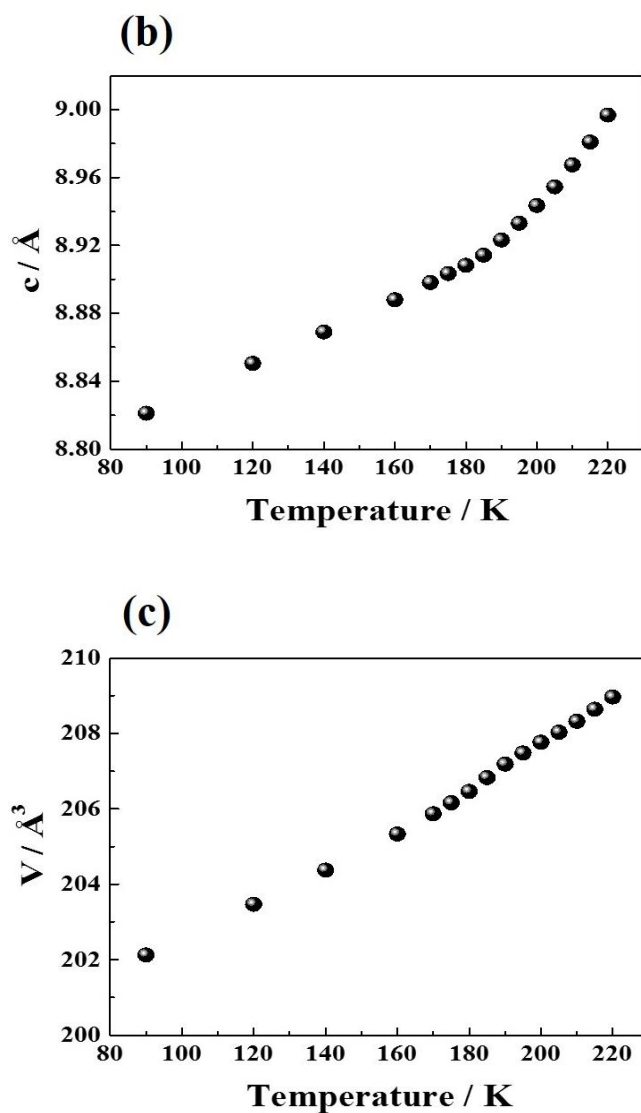

**Figure SI-6.** Variations of (a) the lattice parameter  $a$  and (b) the lattice parameter  $c$  and (c) the volume of 1-fluoro-adamantane in the temperature range of 90K to 220K. The continuity in the variation of the parameters and the volume as a function of temperature confirms the second-order transition.
